# Supplementary material for: Genomic Evaluation of Multiparametric Magnetic Resonance Imaging-visible and -nonvisible Lesions in Clinically Localised Prostate Cancer
Source: PubMed Central journal article supplement — Eur Urol Oncol. 2019 Feb;2(1):1–11. doi: 10.1016/j.euo.2018.08.005 (PMC6472613; doi:10.1016/j.euo.2018.08.005), 2019-02

# Supplementary Figure 1

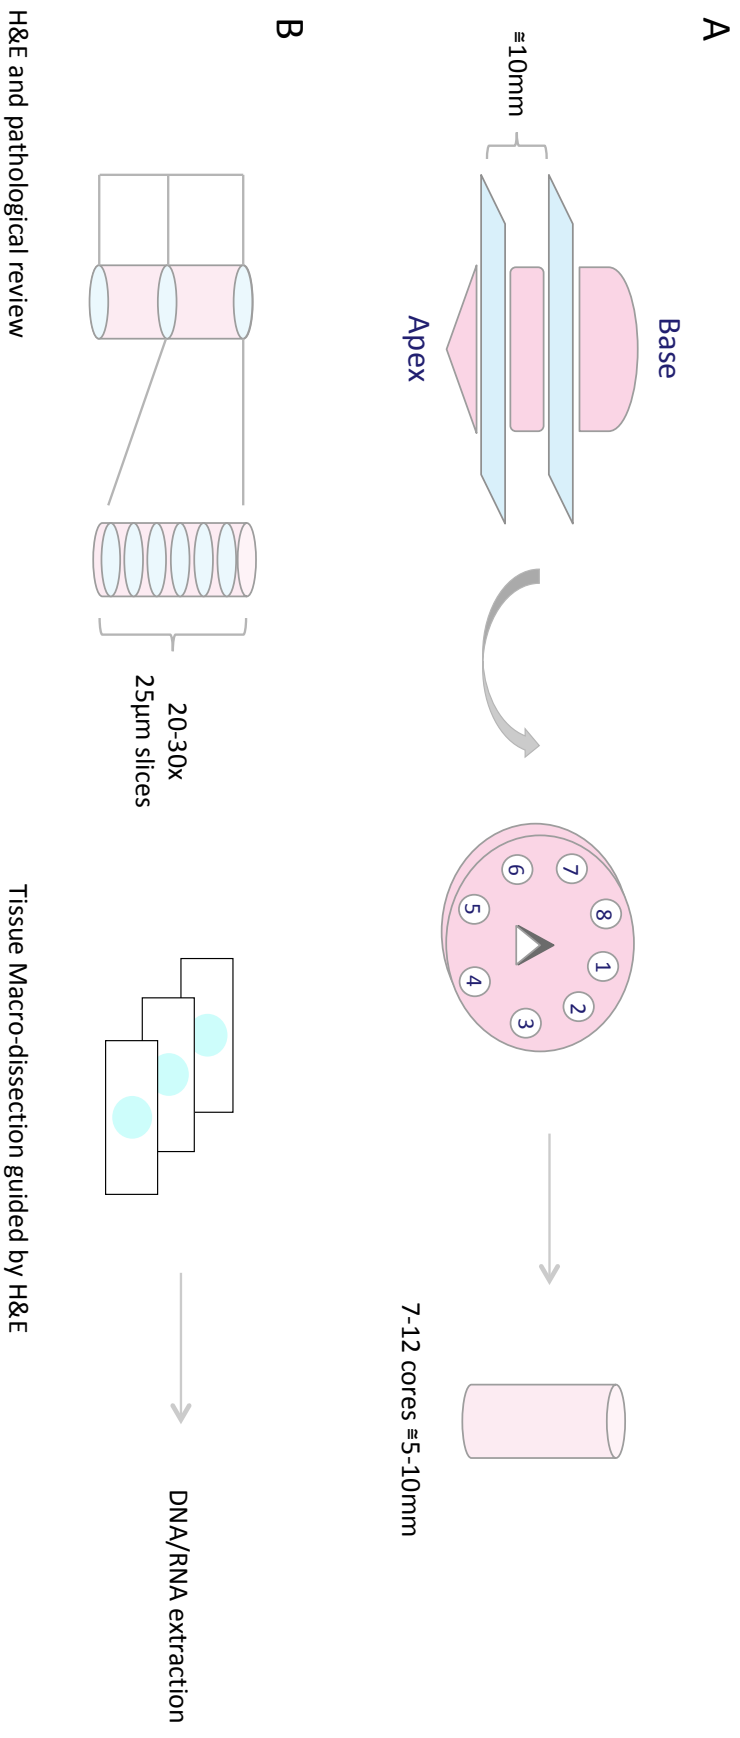

Supplementary Figure 2

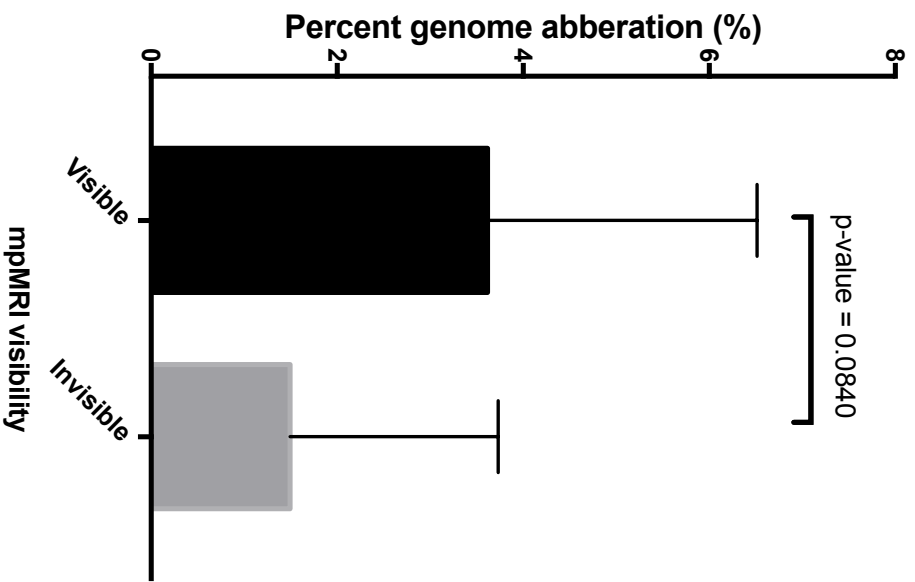

# Supplementary Figure 3

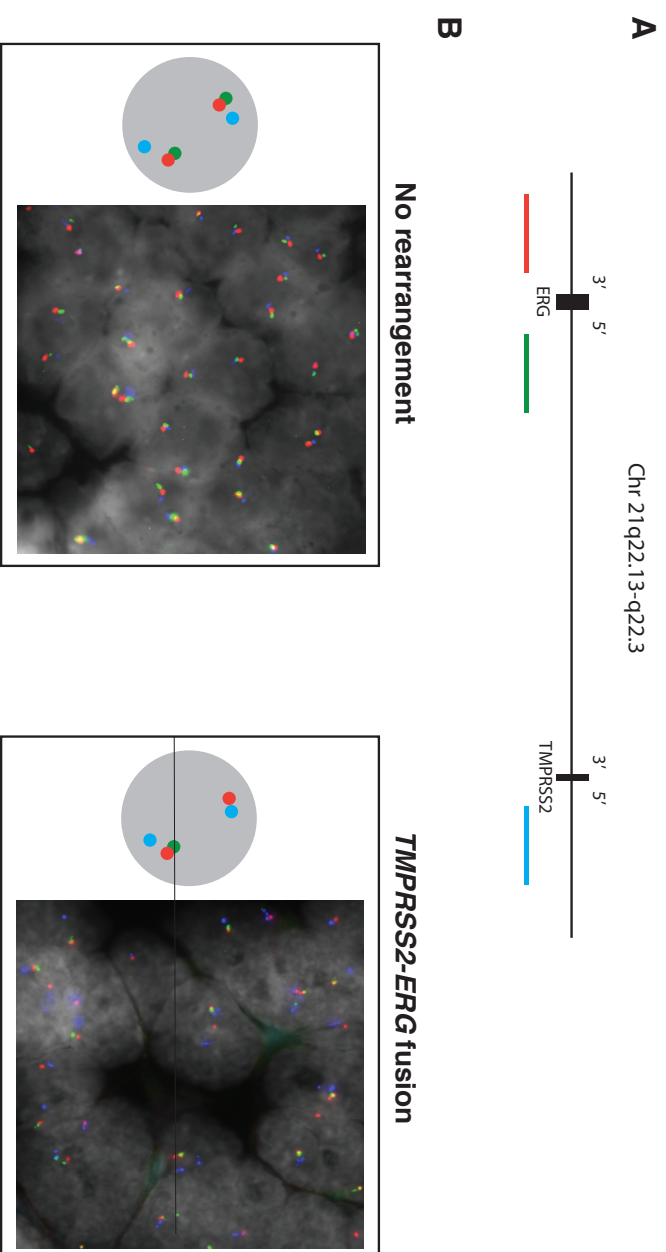

**C**

| Sample | Core | FISH | Cells (%) |
|--------|------|------|-----------|
| Case1  | 1    | N    | 100       |
|        | 2    | N    | 100       |
|        | 5    | N    | 100       |
| Case2  | 2    | N    | 100       |
|        | 3    | N    | 100       |
|        | 4    | N    | 100       |
| Case3  | 1    | TE   | 70.6      |
|        | 2    | TE   | 98.0      |
|        | 6    | N    | 100       |
| Case4  | 1    | n/a  | n/a       |
|        | 2    | N    | 100       |
|        | 3    | N    | 100       |
|        | 5    | N    | 100       |
|        | 6    | TE   | 100       |
| Case5  | 3    | N    | 100       |
|        | 5    | N    | 100       |
|        | 7    | N    | 100       |
| Case6  | 2    | N    | 100       |
|        | 5    | TE   | 95.6      |

N= No TMPRSS2-ERG Fusion  
TE= TMPRSS2-ERG Fusion

Supplementary Figure 4

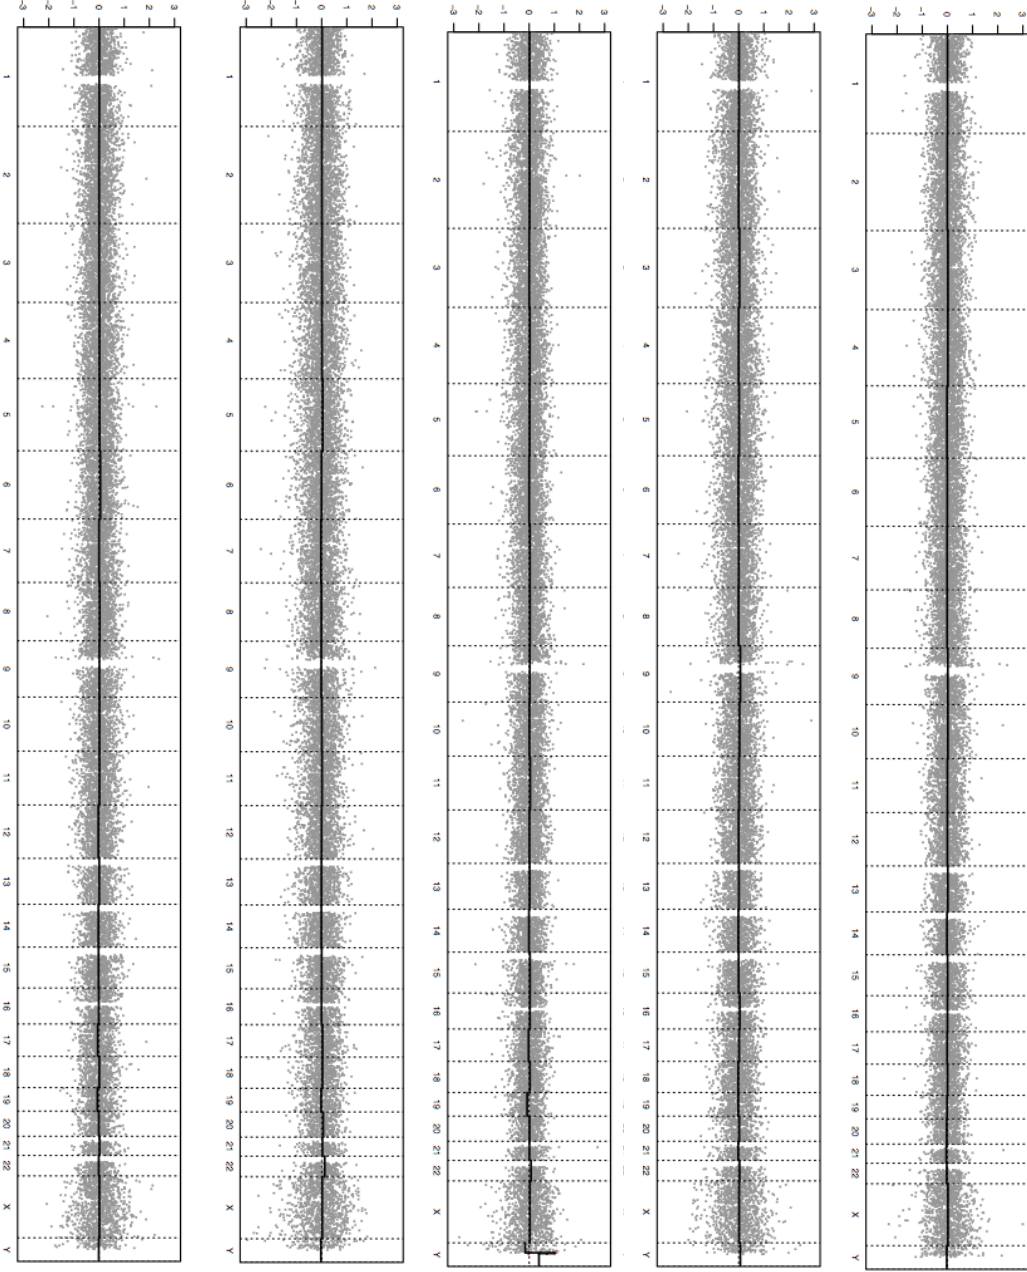

Case 1

Case 2

Case 4

Case 5

Case 6

# Supplementary Figure 5

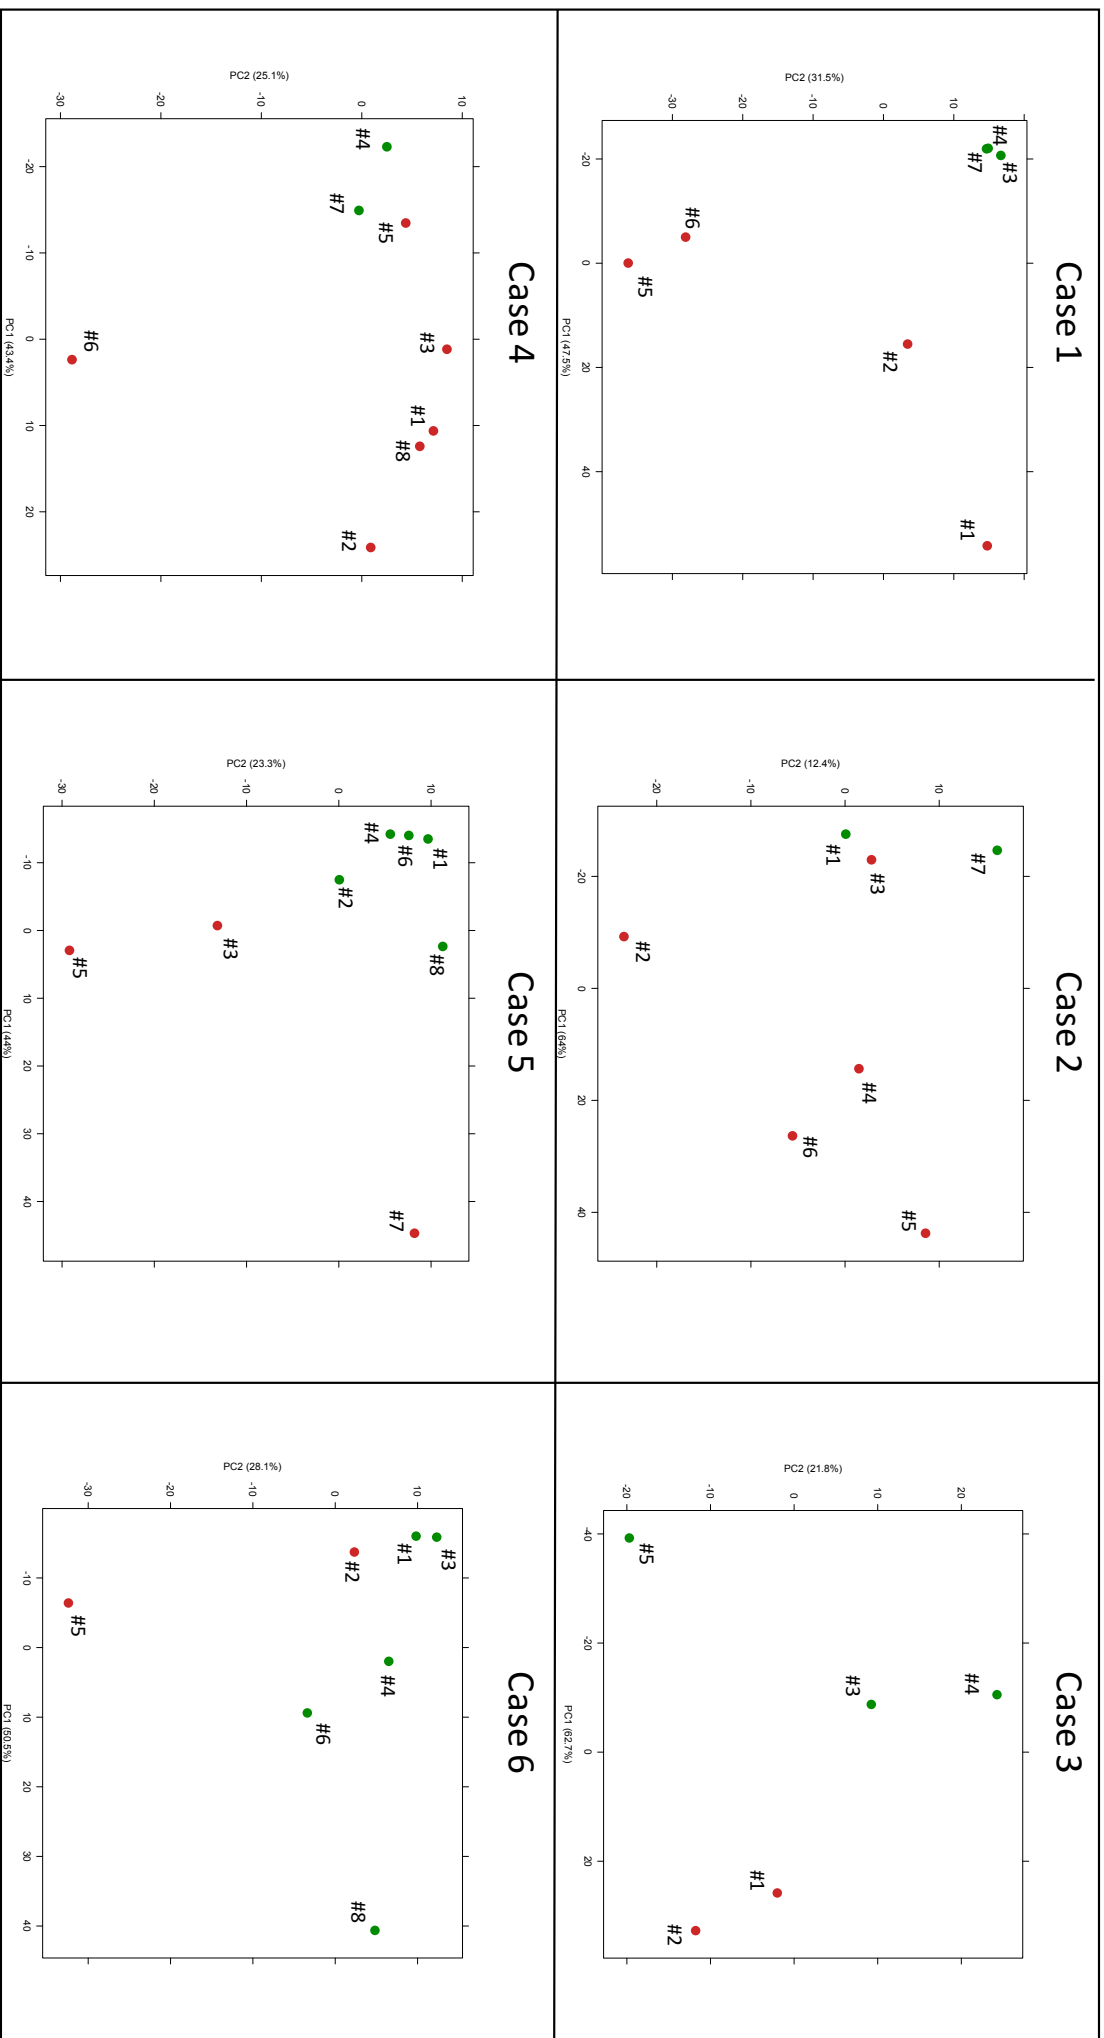

# Supplementary Figure 6

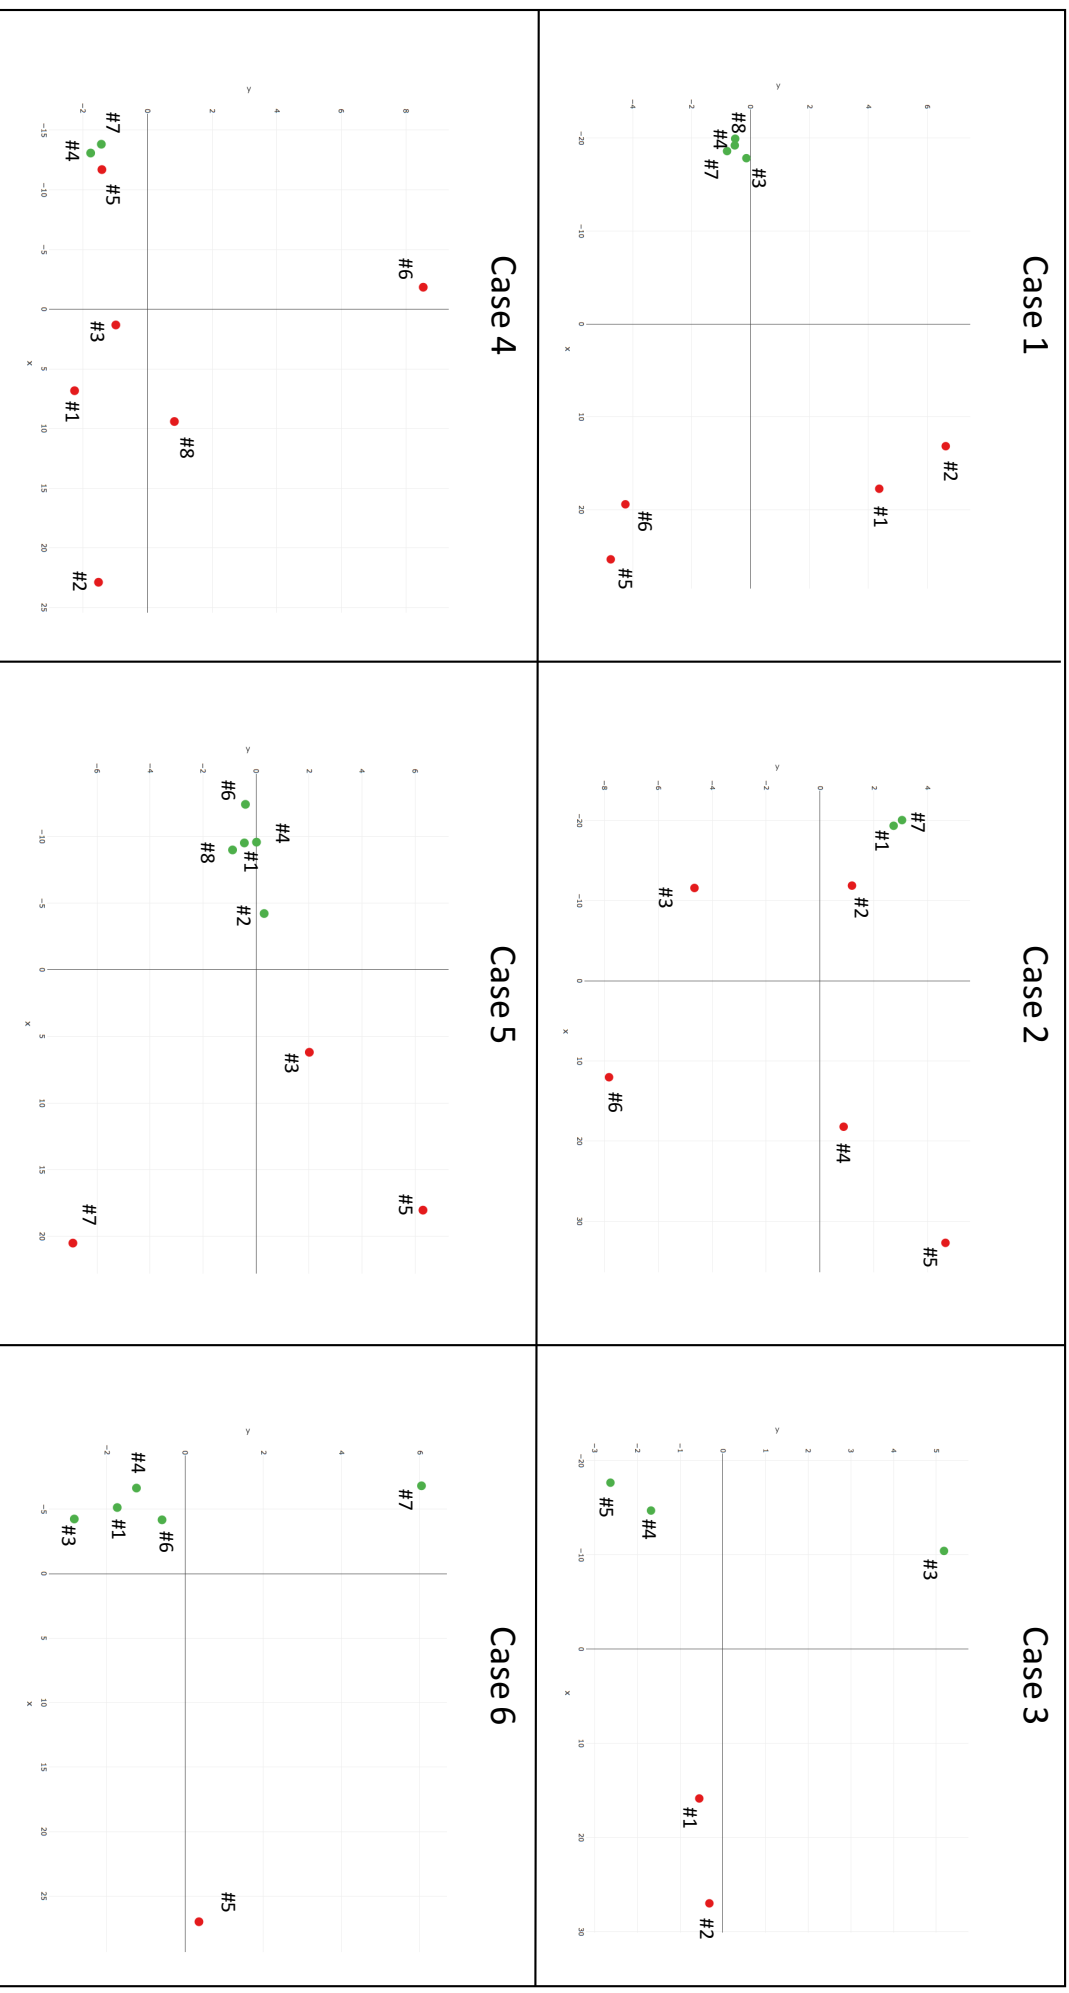

Supplement: mmc4.pdf [file mmc4.pdf]
